# Supplementary material
Source: Springer Nature journal article supplement (https://www.springermedizin.de/resource/supplementary/12913_2013_2811_MOESM1_ESM.pdf/9531526)
Supplement: MOESM1 [file 9531526]

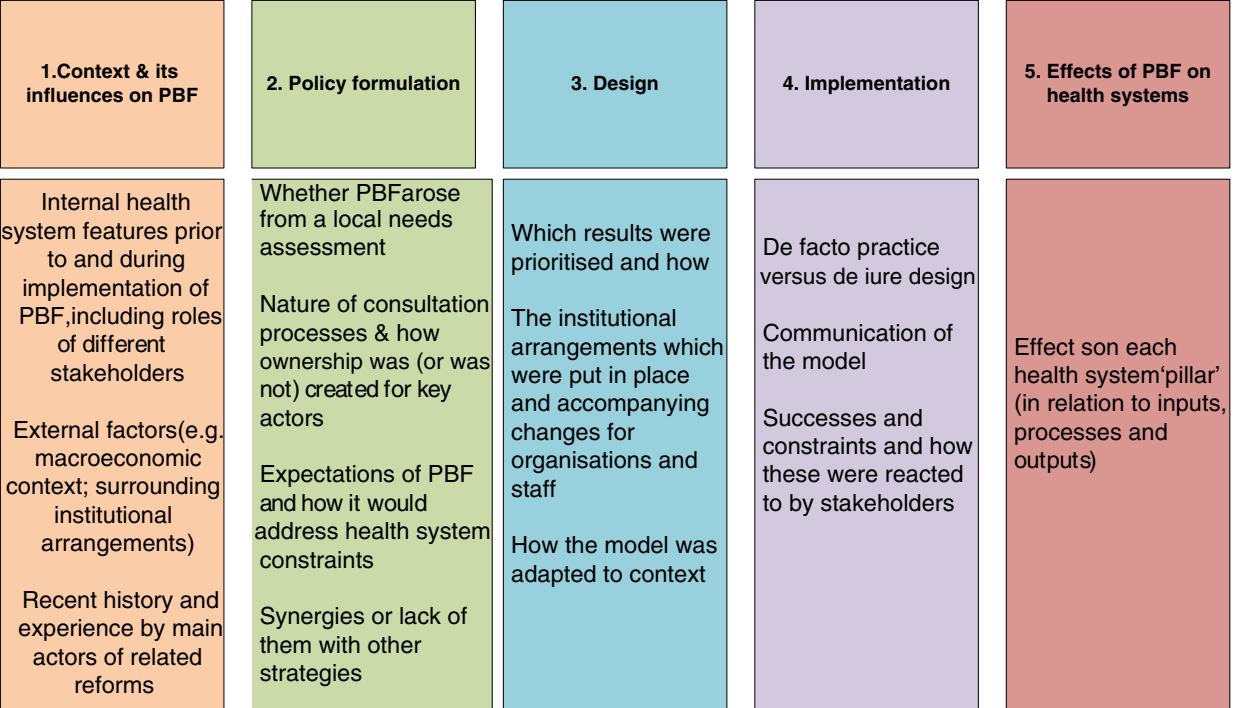

Analysis can also be disaggregated, as relevant, by:

- level (national; district; facility)
- short term versus long term
- sector (public, mission, private)
- region of the country
